# Supplementary material for: Influence of electronic vs. steric factors on the solid-state photochromic performances of new polyoxometalate/spirooxazine and spiropyran hybrid materials
Source: Royal Society of Chemistry journal article supplement (doi:10.1039/c5ra15860e), 2015-01-01
Supplement: c5ra15860e1.pdf [file c5ra15860e1.pdf]

**Influence of Electronic vs. Steric Factors on the Solid-State  
Photochromic Performances of New  
Polyoxometalate/Spirooxazine and Spiropyran Hybrid Materials**

Clotilde Menet, H el ene Serier-Brault, Olivier Oms, Anne Dolbecq, J er ome Marrot, Ali Saad,  
Pierre Mialane,\* St ephane Jobic, Philippe Deniard and R emi Dessapt\*

**Electronic Supplementary Information**

**Figure S1.** Comparison of TGA measurements of (a)  $\text{SN}(\text{NO}_3)$ ,  $\text{SN}_2\text{Mo}_6$  and  $\text{SN}_2\text{W}_6$ , and (b)  $\text{SP}(\text{NO}_3)$ ,  $\text{SP}_2\text{Mo}_6$  and  $\text{SP}_2\text{W}_6$

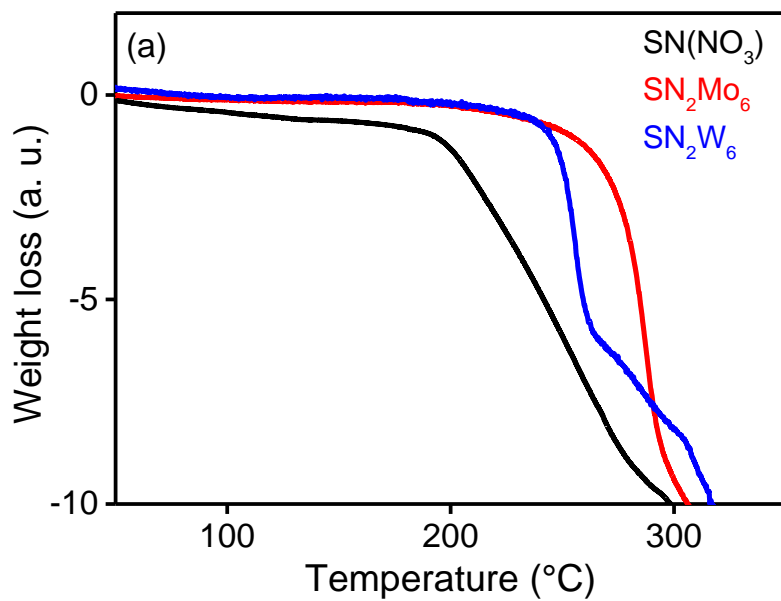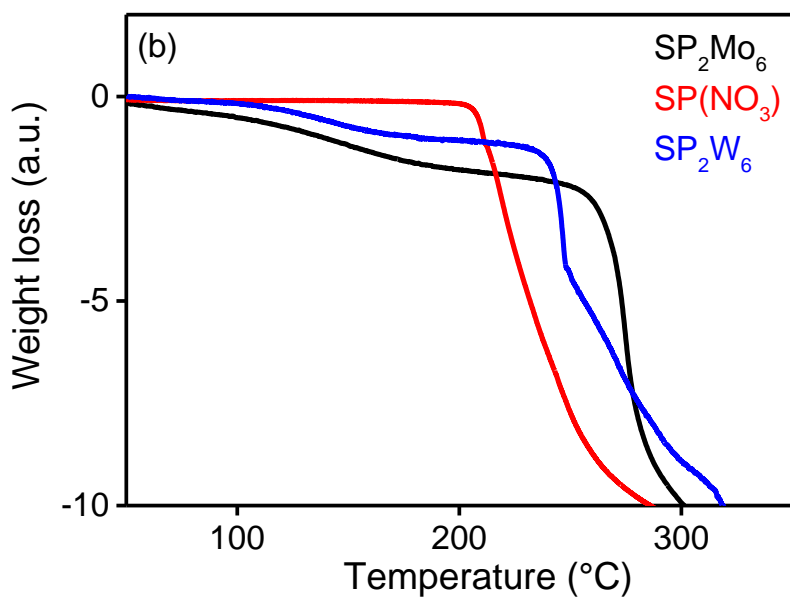

**Fig. S2.** Comparison of the FT-IR spectra of (a)  $\text{SN}_2\text{W}_6$  and (b)  $\text{SN}_2\text{Mo}_6$ .

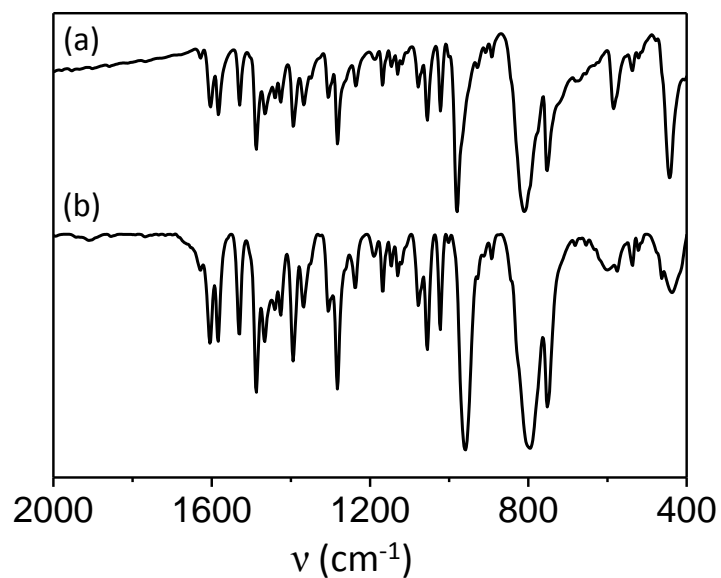

In the spectra of  $\text{SN}_2\text{W}_6$  and  $\text{SN}_2\text{Mo}_6$ , the strong absorption band in the range 1000-400  $\text{cm}^{-1}$  are attributed to the M=O and M-O-M vibration modes of the  $[\text{M}_6\text{O}_{19}]^{2-}$  anions. In addition, the spectra of  $\text{SN}_2\text{W}_6$  and  $\text{SN}_2\text{Mo}_6$  do not show any absorptions around 1670  $\text{cm}^{-1}$ , that are characteristic of the C=O vibration of the DMF molecule.

**Fig. S3.** Normalized Kubelka-Munk transformed reflectivity spectra before UV irradiation of (a)  $\text{SN}_2\text{Mo}_6$  (black),  $\text{SN}(\text{NO}_3)$  (magenta) and  $(\text{TBA})_2[\text{Mo}_6\text{O}_{19}]$  (blue), and (b)  $\text{SN}_2\text{W}_6$  (black),  $\text{SN}(\text{NO}_3)$  (magenta) and  $(\text{TBA})_2[\text{W}_6\text{O}_{19}]$  (blue). The  $\Delta\lambda$  parameter defined as  $\Delta\lambda = \lambda_{\text{max}}^{(\text{spiro})} - \lambda_{\text{max}}^{(\text{POM})}$ , with  $\lambda_{\text{max}}^{(\text{POM})}$  the low-energy LMCT transition of the POM unit. The absorption denoted by an asterisk in the spectrum of  $\text{SN}(\text{NO}_3)$  is assignable to an intermolecular charge-transfer transition between  $\text{SN}$  and  $\text{NO}_3^-$  molecules due to their proximity in the crystalline state.

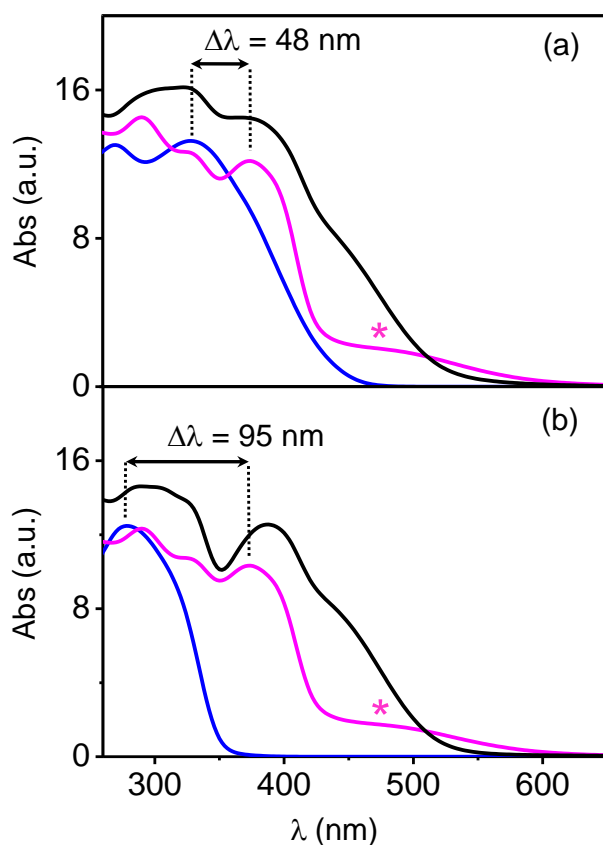

**Fig. S4.** UV-vis spectra in DMSO before UV irradiation of (a)  $\text{SN}_2\text{W}_6$  (black),  $\text{SN}(\text{NO}_3)$  (red) and  $(\text{TBA})_2[\text{W}_6\text{O}_{19}]$  (blue), (b)  $\text{SN}_2\text{Mo}_6$  (black),  $\text{SN}(\text{NO}_3)$  (red) and  $(\text{TBA})_2[\text{Mo}_6\text{O}_{19}]$  (blue), (c)  $\text{SP}_2\text{W}_6$  (black),  $\text{SP}(\text{NO}_3)$  (red) and  $(\text{TBA})_2[\text{W}_6\text{O}_{19}]$  (blue), and (d)  $\text{SP}_2\text{Mo}_6$  (black),  $\text{SP}(\text{NO}_3)$  (red) and  $(\text{TBA})_2[\text{Mo}_6\text{O}_{19}]$  (blue).

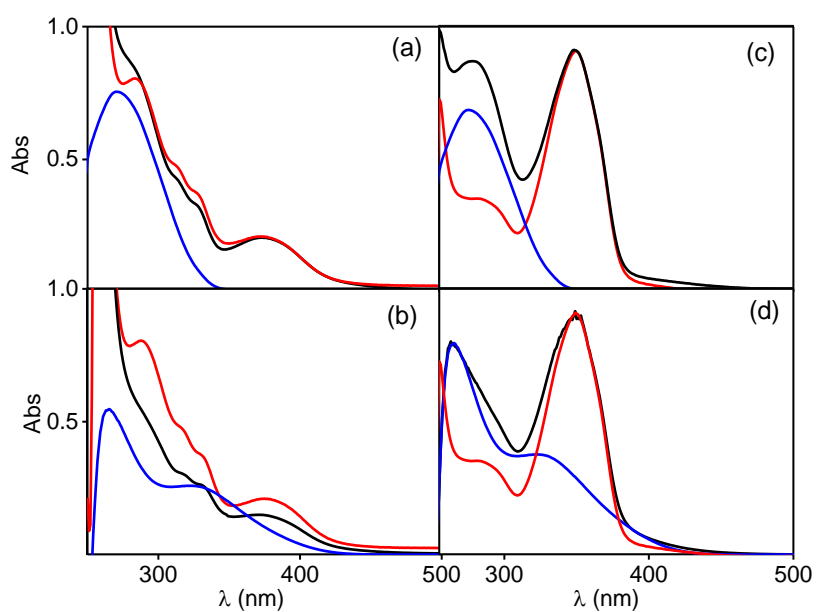

**Fig. S5.** Photographs of the microcrystalline powders of  $\text{SN}_2\text{W}_6$ ,  $\text{SN}_2\text{Mo}_6$ ,  $\text{SP}_2\text{W}_6$  and  $\text{SP}_2\text{Mo}_6$  before UV irradiation.

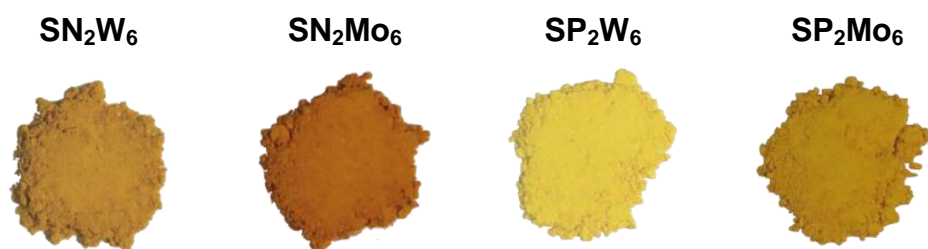

**Fig. S6.** Temporal evolution of the photogenerated absorption of  $\text{SN}_2\text{Mo}_6$  after 0, 0.166, 0.333, 0.5, 1, 2, 3, 6, 10, 15, 20 and 30 min of 365 nm-UV irradiation.

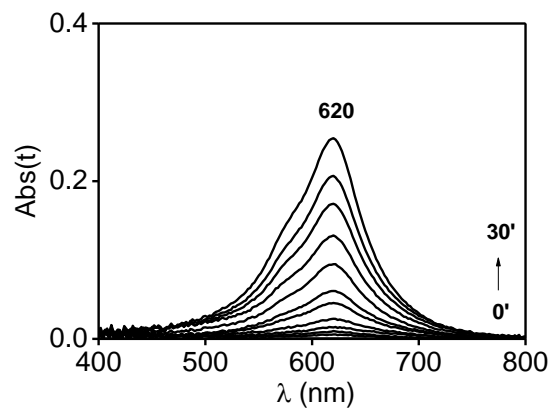

**Fig. S7.** (a) Comparison of the temporal evolutions at room temperature of the absorbance at 590 nm for  $\text{SP}_2\text{W}_6$  under orange light ( $\lambda_{\text{ex}} = 590$  nm) ( $\blacktriangle$ ) and in the dark ( $\bullet$ ) for a sample initially irradiated for 20 min with UV light ( $\lambda_{\text{ex}} = 365$  nm) ( $\blacksquare$ ). The dashed line shows the absorbance value just before switching off the UV light. (b) Evolution of the absorbance monitored at 590 nm for  $\text{SP}_2\text{W}_6$  during successive coloration/bleach cycles at room temperature. For one cycle, the sample has been exposed to UV irradiation ( $\lambda_{\text{ex}} = 365$  nm) for 2 min, and then to orange light ( $\lambda_{\text{ex}} = 590$  nm) for 7 min. The red line corresponds to the linear fit of  $\text{Abs}^{590}(n)$  vs  $n$  ( $R^2 = 0.960$ ).

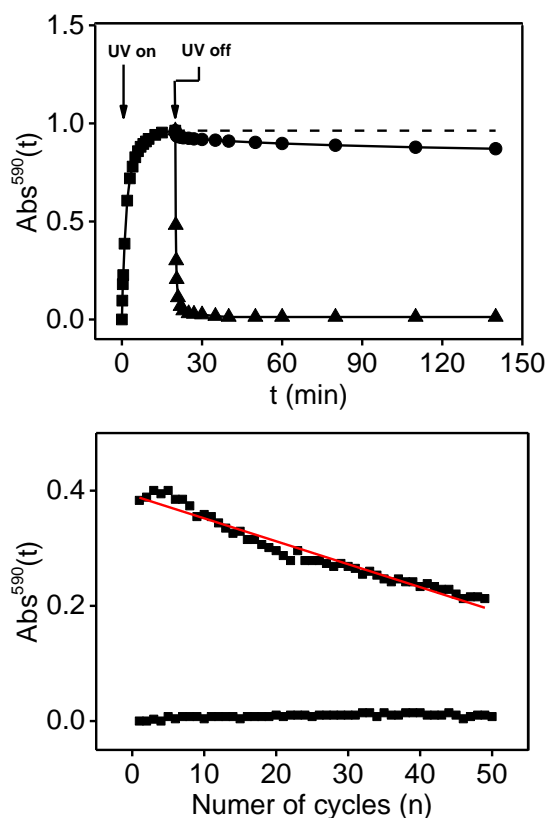



**Table S1.** Photocoloration kinetic parameters of **SP<sub>2</sub>Mo<sub>6</sub>**, **SP<sub>2</sub>W<sub>6</sub>**, **SN<sub>2</sub>Mo<sub>6</sub>** and **SN<sub>2</sub>W<sub>6</sub>**.

|                                                     | <b>SP<sub>2</sub>Mo<sub>6</sub></b> | <b>SP<sub>2</sub>W<sub>6</sub></b> | <b>SN<sub>2</sub>Mo<sub>6</sub></b> | <b>SN<sub>2</sub>W<sub>6</sub></b> |
|-----------------------------------------------------|-------------------------------------|------------------------------------|-------------------------------------|------------------------------------|
| $\lambda_{\max}^{(MC)}$ (nm) <sup>a</sup>           | 590                                 | 590                                | 620                                 | 620                                |
| $A_1^b$                                             | 0.330                               | 0.588                              | 0.339                               | 1.393                              |
| $A_2^b$                                             | 0.036                               | 0.377                              | 0.027                               | 0.315                              |
| $k_1^c \times 10^3$ (s <sup>-1</sup> ) <sup>c</sup> | 0.6                                 | 13.4                               | 0.6                                 | 10.5                               |
| $k_2^c \times 10^3$ (s <sup>-1</sup> ) <sup>c</sup> | 9.4                                 | 3.6                                | 12.4                                | 125.5                              |
| $R^2$ <sup>d</sup>                                  | 0.9993                              | 0.9997                             | 0.9998                              | 0.9995                             |
| $t_{1/2}$ (min) <sup>e</sup>                        | 15                                  | 1.3                                | 16                                  | 0.8                                |

<sup>a</sup>Photoinduced absorption band wavelength of the merocyanin form of the spiro-molecule. <sup>b</sup>The  $Abs^{\lambda_{\max}}(t)$  vs  $t$  plots were fitted as  $Abs^{\lambda_{\max}}(t) = -A_1 - A_2 + A_1 \exp(-k_1^c t) + A_2 \exp(-k_2^c t)$ . <sup>c</sup>Coloration rate constants. <sup>d</sup>Regression coefficient for the  $Abs^{\lambda_{\max}}(t)$  vs  $t$  plots. <sup>e</sup>coloration half-life time.

**Table S2.** Fading kinetic parameters of **SN<sub>2</sub>W<sub>6</sub>** and **SP<sub>2</sub>W<sub>6</sub>**.

| <b>Fading under yellow light</b>                    |                                    |                                    |
|-----------------------------------------------------|------------------------------------|------------------------------------|
|                                                     | <b>SN<sub>2</sub>W<sub>6</sub></b> | <b>SP<sub>2</sub>W<sub>6</sub></b> |
| $\lambda_{\max}^a$ (nm)                             | 620                                | 590                                |
| $A_0$                                               | 1.691                              | 0.850                              |
| $A_1^b$                                             | 0.972                              | 0.699                              |
| $A_2^b$                                             | 0.66                               | 0.135                              |
| $k_1^c \times 10^3$ (s <sup>-1</sup> ) <sup>c</sup> | 48.8                               | 71.3                               |
| $k_2^c \times 10^3$ (s <sup>-1</sup> ) <sup>c</sup> | 3.3                                | 7.7                                |
| $R^2$ <sup>d</sup>                                  | 0.9960                             | 0.9997                             |

  

| <b>Thermal fading</b>                               |                                    |                                    |
|-----------------------------------------------------|------------------------------------|------------------------------------|
|                                                     | <b>SN<sub>2</sub>W<sub>6</sub></b> | <b>SP<sub>2</sub>W<sub>6</sub></b> |
| $\lambda_{\max}^a$ (nm)                             | 620                                | 590                                |
| $A_0$                                               | 1.717                              | 0.863                              |
| $A_1^b$                                             | 0.027                              | 0.033                              |
| $A_2^b$                                             | 0.070                              | 0.066                              |
| $k_1^c \times 10^3$ (s <sup>-1</sup> ) <sup>c</sup> | 33.9                               | 44.0                               |
| $k_2^c \times 10^3$ (s <sup>-1</sup> ) <sup>c</sup> | 0.3                                | 0.3                                |
| $R^2$ <sup>d</sup>                                  | 0.9970                             | 0.9981                             |

<sup>a</sup>Photoinduced absorption band wavelength. <sup>b</sup>The  $Abs^{\lambda_{\max}}(t)$  vs  $t$  plots were fitted as  $Abs^{\lambda_{\max}}(t) = (A_0 - A_1 - A_2) + A_1 \exp(-k_1^f t) + A_2 \exp(-k_2^f t)$ . <sup>c</sup>Coloration rate constants. <sup>d</sup>Regression coefficient for the  $Abs^{\lambda_{\max}}(t)$  vs  $t$  plots.
